# Supplementary material for: Increased Level of Long Non-Coding RNA MALAT1 Is a Common Feature of Amoeboid Invasion
Source: MDPI journal article supplement (doi:10.3390/cancers12051136), 2020-05-01
Supplement: s1 [file s1]

# Increased Level of Long Non-Coding RNA MALAT1 is a Common Feature of Amoeboid Invasion

Ladislav Merta, Aneta Gandalovičová, Vladimír Čermák, Michal Dibus, Tony Gutschner, Sven Diederichs, Daniel Rösel and Jan Brábek

## Supplementary Materials

**A**

Genes UPREGULATED in amoeboid form

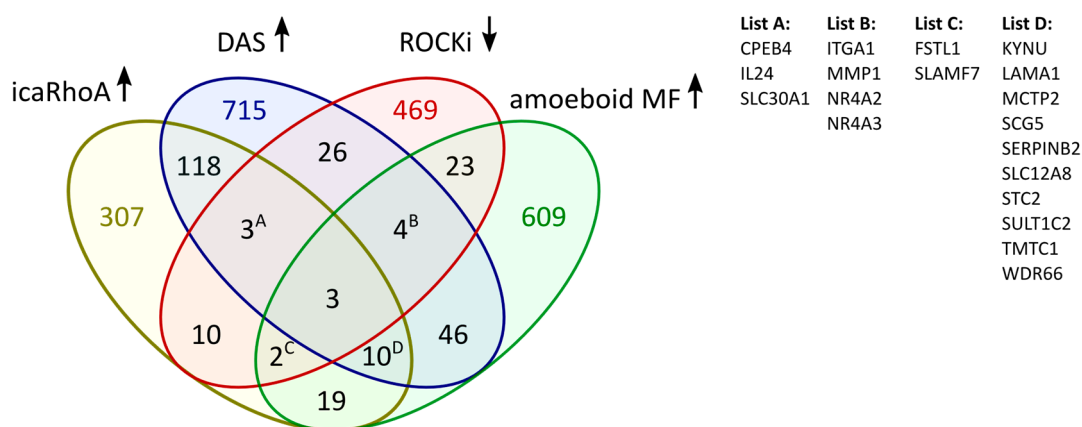

**B**

Genes DOWNREGULATED in amoeboid form

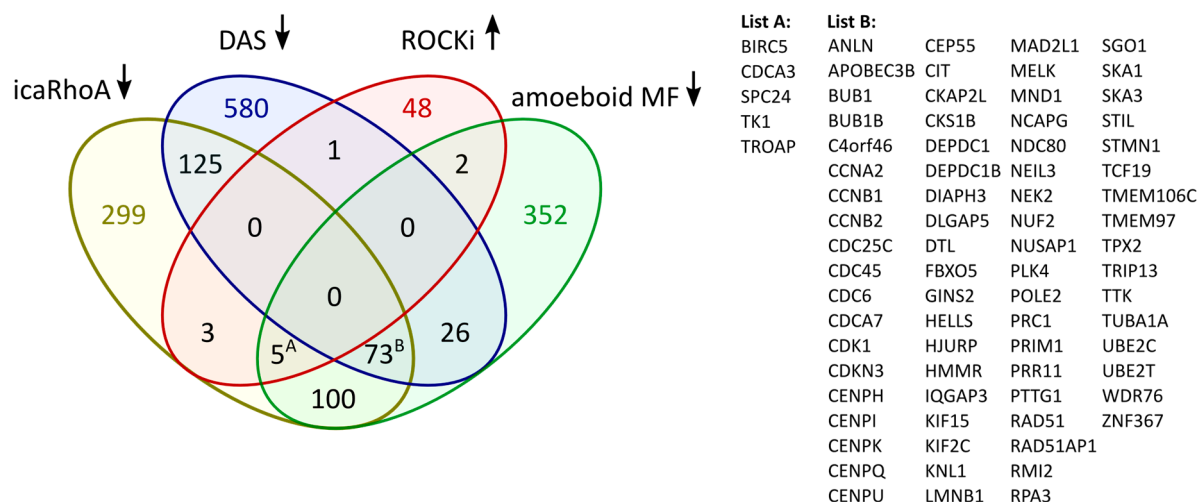

**Figure 1.** Transcriptomic overlaps of only 3 datasets used for meta-analysis. (A) Venn diagram of gene sets upregulated in the amoeboid HT1080 cells and macrophages, and suppressed in A375m2 cells by ROCK inhibitors (ROCKi). (B) Venn diagram of gene sets downregulated in the amoeboid HT1080 cells and macrophages, and upregulated in A375m2 cells by ROCK inhibitors. Lists of the genes are provided for overlaps of 3 gene sets.

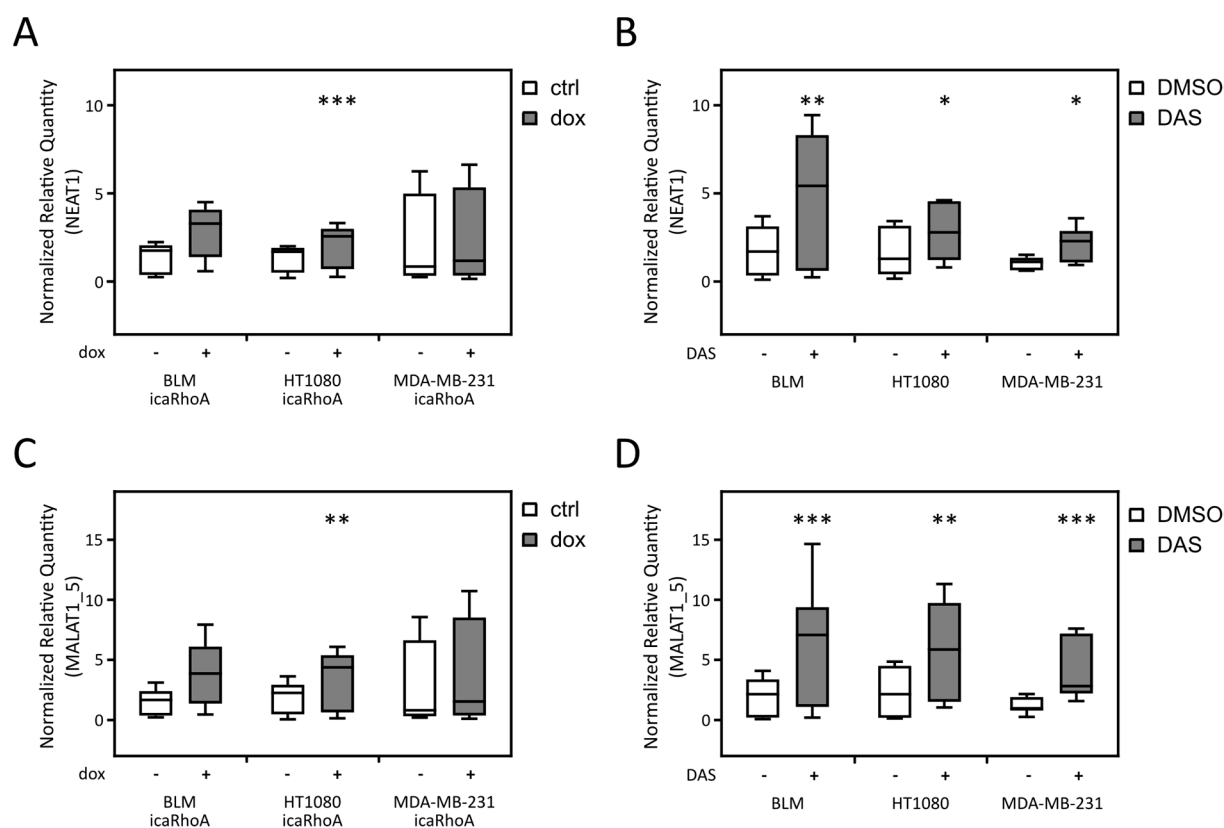

**Figure 2.** RT-qPCR analysis of NEAT1 and second pair of primers for MALAT1 in cells undergoing MAT. (A-B) Analysis of the NEAT1 gene expression in cells undergoing MAT by induction of constitutively active RhoA (A) or by dasatinib treatment (B). (C-D) Analysis of the MALAT1 gene expression (using primer pair pairing with 5' end of the transcript) in cells undergoing MAT by induction of constitutively active RhoA (C) or by dasatinib treatment (D). Median values are marked in the box plots, whiskers represent min to max value. P-values: \*\*\*  $p < 0.001$ , \*\*  $p < 0.01$ , \*  $p < 0.05$ . All data are a representation of at least 3 independent experiments.

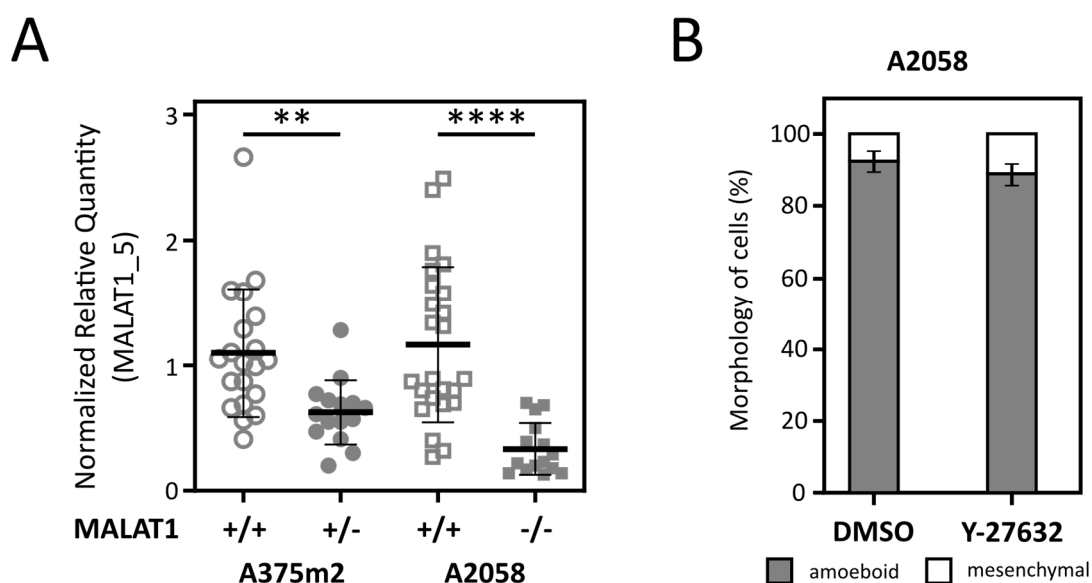

**Figure 3.** Complementary RT-qPCR quantification of MALAT1 level in clones derived from A375m2 and A2058 cell lines and quantification of cell morphology of A2058 cells after treatment with Y-27632. (A) RT-qPCR analysis of MALAT1 level in clones derived from the A375m2 and A2058 cell lines using second pair of primers pairing with the 5' end of MALAT1 transcript. N(A375m2 MALAT1 +/+) = 20 clones; N(A375m2 MALAT1 +/-) = 15 clones; N(A2058 MALAT1 +/+) = 24 clones; N(A2058 MALAT1 -/-) = 15 clones. Data represent mean  $\pm$  SD. (B) morphology of A2058 cells after treatment with ROCK inhibitor Y-27632. Data represent mean  $\pm$  SD. P-values: \*\*\*\*  $p < 0.0001$ , \*\*  $p < 0.01$ . All data are a representation of at least 3 independent experiments.

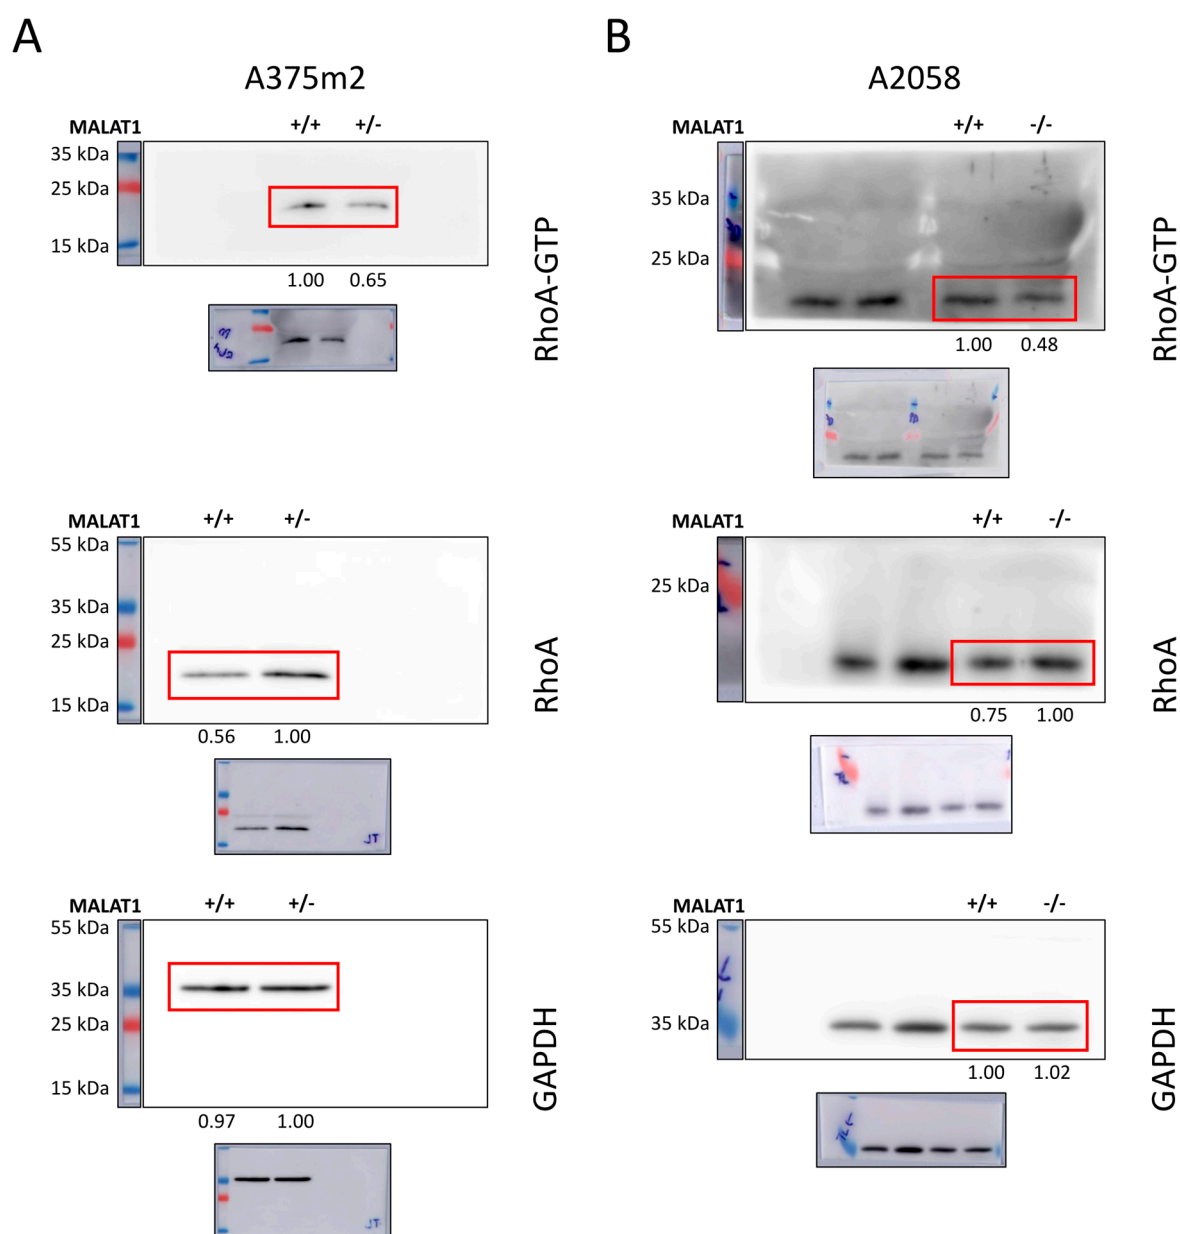

**Figure 4.** Uncropped Western blots used in the study. (A) Uncropped blots used in Figure 3D. (B) Uncropped blots used in Figure 4C. Red rectangle marks the area presented in the main text. The numbers below the bands represent the intensity ratio. Because the machine used to visualize the blots uses different channels of photo acquisition, each part consists of the HRP signal (the channel from which the cropped images were made) + added marker (upper part) and the whole membrane HRP signal and transmitted light composite channel (lower part).

**Table 1.** RT-qPCR primers used in the work.

| TRANSCRIPT | ACC. NUMBER | PRIMER                | SEQUENCE                | nt | %GC  | T <sub>m</sub> (°C) | PRODUCT (bp) | Eff   |
|------------|-------------|-----------------------|-------------------------|----|------|---------------------|--------------|-------|
| EIF4H      | NM_022170   | EIF4Ha                | CCTTCTGGCTACGGGAACCAT   | 21 | 57.1 | 63.3                | 95           | 1.977 |
|            |             | EIF4Hs                | CTTCGACACCTACGACGATCG   | 21 | 57.1 | 63.3                |              |       |
| GAPDH      | NM_002046   | GAPDH <sub>a</sub>    | GCATGGACTGTGGTCATGAG    | 20 | 55.0 | 60.5                | 87           | 2.012 |
|            |             | GAPDH <sub>s</sub>    | CTGCACCACCAACTGCTTAG    | 20 | 55.0 | 60.5                |              |       |
| HNRNPL     | NM_001533   | HNRNPL <sub>a</sub>   | GCGCTCACTTTTGCCTGAGAA   | 21 | 52.4 | 61.3                | 96           | 1.993 |
|            |             | HNRNPL <sub>s</sub>   | CTGGAGGTGACCGAGGAGAA    | 20 | 60.0 | 62.5                |              |       |
| MALAT1     | NR_002819   | MALAT1_3 <sub>a</sub> | GGTCTGTGCTAGATCAAAAGG   | 21 | 47.6 | 59.4                | 71           | 2.010 |
|            |             | MALAT1_3 <sub>s</sub> | AAAGCAAGGTCTCCCCACAAG   | 21 | 52.4 | 61.3                |              |       |
| MALAT1_5   | NR_002819   | MALAT1_5 <sub>a</sub> | GTTTCATCCTACCACTCCCAAT  | 22 | 45.5 | 60.3                | 85           | 1.992 |
|            |             | MALAT1_5 <sub>s</sub> | GAATTGCGTCATTTAAAGCCTA  | 22 | 36.4 | 56.5                |              |       |
| NEAT1      | NR_131012   | 5NEAT1 <sub>f</sub>   | GTGGTAGGAAATGCAGGTTGA   | 21 | 47.6 | 59.4                | 122          | 1.904 |
|            |             | 5NEAT1 <sub>r</sub>   | CCAAGCAACAACCTTAACCAACA | 22 | 40.9 | 58.4                |              |       |
| PPIA       | NM_021130   | PPIA <sub>f</sub>     | GCCGAGGAAAACCGTGTAATA   | 21 | 52.4 | 61.3                | 106          | 1.941 |
|            |             | PPIA <sub>r</sub>     | CTGCAAAACAGCTCAAAGGAGAC | 22 | 50.0 | 62.1                |              |       |
| PSMA1      | NM_148976   | PSMA1 <sub>a</sub>    | AGACCAACTGTGGCTGAACCT   | 21 | 52.4 | 61.3                | 95           | 1.945 |
|            |             | PSMA1 <sub>s</sub>    | GACAATGATGTCACCTGTTTGAG | 23 | 43.5 | 61.1                |              |       |

Nt; Number of nucleotides, T<sub>m</sub>; Melting temperature, Eff; Amplification efficiency determined by standard curve analysis.

**Table 2.** Reference genes used for respective cell lines in RT-qPCR analysis.

| Cell line/clones derived from cell line | Reference genes |
|-----------------------------------------|-----------------|
| BLM (DMSO/DAS)                          | EIF4H, GAPDH    |
| BLM icaRhoA (-dox/+dox)                 | EIF4H, HNRNPL   |
| HT1080 (DMSO/DAS)                       | EIF4H, GAPDH    |
| HT1080 icaRhoA (-dox/+dox)              | EIF4H, GAPDH    |
| MDA-MB-231 (DMSO/DAS)                   | HNRNPL, PSMA1   |
| MDA-MB-231 (-dox/+dox)                  | EIF4H, HNRNPL   |
| A375m2 clones                           | EIF4H, PPIA     |
| A2058 clones                            | PPIA, PSMA      |
